# Supplementary material
Source: HighWire-hosted journal article supplement (https://www.cmaj.ca/highwire/filestream/58439/field_highwire_adjunct_files/5/guideline_patient_5french2001.pdf)
Supplement: guideline_patient_5french2001.pdf [file guideline_patient_5french2001.pdf]

## **Questions et réponses sur le cancer du sein**

### **Guide 5. Le traitement du carcinome canalaire in situ (CCIS) (révisé le 2 octobre 2001)**

#### **Qu'est-ce que le CCIS?**

CCIS veut dire « carcinome canalaire in situ », et il s'agit d'un type de cancer qu'on trouve seulement dans les canaux de lactation du sein. On parle aussi de cancer du sein « non envahissant », parce que le cancer ne s'est pas propagé aux tissus en dehors des canaux de lactation. Le pronostic pour les femmes atteintes d'un CCIS est bien meilleur que pour celles atteintes d'un cancer envahissant. Un CCIS non traité peut toutefois devenir envahissant avec le temps. Un CCIS pourrait traverser la paroi du canal pour se propager dans le tissu voisin et même ailleurs dans le corps. Si ça se produit, le cancer n'est plus un CCIS et il faut le traiter comme un cancer envahissant. Le traitement décrit dans ce guide s'applique aux patientes qui sont atteintes *seulement* d'un CCIS, et pas d'un cancer du sein envahissant.

#### **Le CCIS est-il répandu?**

Puisqu'un plus grand nombre de Canadiennes se prêtent désormais aux mammographies de dépistage, on pose le diagnostic de CCIS plus souvent. À l'heure actuelle, le CCIS représente de 20 à 25 % de l'ensemble des cancers du sein découverts chez les femmes qui se soumettent régulièrement aux examens mammographiques.

#### **Que se passera-t-il si on découvre à la fois un CCIS et un cancer du sein envahissant?**

Puisque la grande majorité des cancers du sein apparaissent d'abord dans les canaux de lactation, les rapports de laboratoire qui font état d'un cancer du sein décrivent dans presque tous les cas une forme de CCIS. Lorsqu'un CCIS et un cancer envahissant sont constatés simultanément, il faut appliquer un traitement contre le cancer envahissant.

#### **Comment saurai-je que j'ai un CCIS?**

Habituellement, lorsqu'une femme a un CCIS, il n'y a pas de signes avertisseurs comme la présence d'une masse au sein. Dans la plupart des cas, la présence d'un CCIS est révélée par une mammographie réalisée à une clinique de dépistage. Votre médecin pourrait penser que vous êtes atteinte d'un CCIS s'il voit des calcifications (dépôts de calcium) sur votre cliché mammaire. Néanmoins, vous saurez avec certitude que vous êtes atteinte d'un CCIS seulement si on pratique une « biopsie », c'est-à-dire le prélèvement et l'examen d'un fragment de tissu mammaire. On recourt couramment à la biopsie « à l'aiguille », où un petit fragment de tissu est prélevé à l'aide d'une aiguille. Le prélèvement est ensuite étudié au microscope par un pathologiste (un médecin spécialiste de l'examen des tissus). Si le pathologiste constate la présence de cellules cancéreuses typiques à l'intérieur des canaux de lactation, un diagnostic de CCIS sera établi.

### **Pourquoi mon médecin recommande-t-il que je subisse une biopsie chirurgicale?**

Si la première biopsie que vous avez subie était une biopsie à l'aiguille dont le prélèvement contenait des cellules cancéreuses, vous devrez vous soumettre à une biopsie « chirurgicale » pour qu'on détermine si le cancer a envahi les tissus voisins. Au cours d'une telle biopsie, on prélève un plus grand volume de tissu mammaire. (Si un diagnostic de CCIS semble très probable, le médecin recommandera souvent qu'une biopsie chirurgicale, plutôt qu'une biopsie à l'aiguille, soit pratiquée en premier lieu.) La biopsie chirurgicale est cruciale, car un cancer qui se propage en dehors des canaux de lactation n'est plus simplement un CCIS, c'est un cancer « envahissant », et il faudra recourir à un autre genre de traitement.

Lorsqu'on procède à une biopsie chirurgicale, l'anomalie est enlevée d'une seule pièce et radiographiée. On examine ensuite des fragments de tissu au microscope. Si la radiographie des tissus prélevés indique que le cancer n'a *pas* été enlevé au complet, vous devrez subir une deuxième mammographie après la guérison de vos tissus mammaires. Il faudra peut-être que vous vous soumettiez également à une autre intervention pour enlever les cellules cancéreuses qui restent.

### **Les résultats de la biopsie chirurgicale que j'ai subie indiquent que j'ai un CCIS. Que dois-je faire maintenant?**

Lorsque vous aurez été informée de tous les résultats de votre biopsie chirurgicale, vous pourrez commencer à envisager vos choix de traitement. Le CCIS n'est pas un cancer à évolution rapide, et c'est pourquoi il est tout à fait sûr de prendre le temps qu'il faut pour consulter vos médecins, les membres de votre famille, vos amis ou d'autres femmes qui ont eu un cancer du sein.

### **Quel est le meilleur traitement pour moi?**

Il faut d'abord se pencher sur la possibilité que la biopsie chirurgicale n'ait pas enlevé tout le cancer. S'il est possible qu'il reste des cellules cancéreuses, il faudra appliquer d'autres traitements. En règle générale, cela signifie que vous devrez vous soumettre à une autre chirurgie. Votre principale tâche consistera à décider du genre de chirurgie qui vous convient le mieux.

Auparavant, lorsqu'on diagnostiquait un CCIS, cela supposait toujours une « mastectomie » (ablation du sein au complet), et cette intervention pourrait continuer de constituer la meilleure solution pour certaines femmes. L'autre choix, c'est la « tumorectomie » (qu'on appelle aussi « chirurgie mammaire conservatrice ») suivie d'un traitement aux rayonnements (« radiothérapie »). C'est maintenant la tumorectomie suivie d'une radiothérapie que l'on recommande généralement dans les cas de cancer du sein envahissant primaire, ainsi que dans les cas de CCIS.

Que vous choisissiez la mastectomie ou la tumorectomie suivie d'une radiothérapie, les taux de survie sont très élevés : entre 95 % et 100 %, dix ans après l'intervention chirurgicale.

Si la biopsie chirurgicale a retiré l'ensemble du cancer et qu'on n'observe pas d'autres régions du sein susceptibles d'être atteintes, on peut estimer que la biopsie

chirurgicale a tenu lieu de tumorectomie et il n'est pas nécessaire de pratiquer d'autres interventions chirurgicales.

### **De quels facteurs dois-je tenir compte pour choisir entre la mastectomie et la tumorectomie?**

Vous devrez discuter avec votre médecin du type de CCIS qui a été décelé dans votre sein et de l'ampleur de la région mammaire atteinte. Vous voudrez aussi tenir compte des facteurs énumérés ci-dessous, dont un grand nombre sont présentés plus en détail dans le [guide 3](#).

- *Vos préoccupations au sujet de votre apparence.* Vous devrez d'abord vous demander si vous voulez conserver le sein. Il s'agit d'une question très personnelle. Certaines femmes voudront que la première apparence de leurs seins soit préservée dans toute la mesure du possible. Chez ces femmes, la tumorectomie est l'intervention la plus souhaitable puisqu'elle retire le cancer tout en préservant suffisamment de tissus pour que le sein conserve une apparence et une sensation au toucher naturelles. D'autres femmes souhaiteront plutôt faire tout ce qu'elles peuvent pour réduire le risque de réapparition du cancer. Ces femmes pourraient choisir de subir une mastectomie. Les patientes qui préfèrent la mastectomie peuvent envisager une reconstruction du sein pour faciliter leur adaptation aux changements de leur corps tout en étant assurées que le cancer ne réapparaîtra pas. De nos jours, il y a d'excellentes chances que le cancer soit contrôlé au moyen d'une mastectomie ou d'une tumorectomie suivie d'une radiothérapie. Bon nombre de femmes choisissent donc de conserver le sein. Vous devrez choisir l'option chirurgicale avec laquelle vous vous sentez le plus à l'aise.
- *La présence de cellules cancéreuses sur les bords du fragment de tissus prélevés pendant la biopsie chirurgicale.* Lorsque l'examen des tissus prélevés lors de la biopsie chirurgicale révèle la présence de cellules cancéreuses sur les bords du fragment, les femmes qui ont choisi la tumorectomie pourraient devoir subir une deuxième ou même une troisième intervention pour qu'on retire plus de tissus. Si vous voulez échapper à la possibilité de devoir subir plusieurs interventions, vous pourriez vouloir envisager la mastectomie.
- *La probabilité de réapparition du cancer dans le même sein.* Si votre tumeur est grosse ou comporte d'autres caractéristiques qui indiquent qu'une récurrence du cancer est probable (p. ex., la présence de cellules cancéreuses près des bords du fragment prélevé, ou un cancer à évolution rapide), vous pourriez envisager la mastectomie.
- *Le volume de tissus à enlever.* S'il y a plus d'une tumeur ou si la tumeur est grosse, la tumorectomie prélèvera beaucoup de tissus. S'il est entendu que le recours à la tumorectomie déformera le sein, vous voudrez peut-être envisager de choisir une mastectomie ou une mastectomie suivie d'une reconstruction du sein.
- *Votre capacité de subir une radiothérapie.* On recommande habituellement qu'une radiothérapie soit administrée après la tumorectomie parce qu'elle réduit le risque de réapparition du cancer dans le même sein. S'il vous est impossible de suivre une radiothérapie pour quelque raison que ce soit, ou s'il vous serait très difficile de le faire à cause de votre travail ou parce que vous vivez loin d'un centre de traitement, vous voudrez peut-être envisager la mastectomie. (Dans un nombre restreint de cas, si la tumeur est très petite et qu'elle ne présente aucune caractéristique qui indique qu'elle est particulièrement susceptible de réapparaître, et s'il est certain qu'on a

enlevé tous les tissus atteints, on pourrait envisager une tumorectomie *sans* radiothérapie. Toutefois, vous ne devriez vous pencher sur cette possibilité qu'après avoir analysé les enjeux à fond avec votre médecin.)

- *Les complications que peut entraîner chaque intervention.* Tous les traitements peuvent avoir des effets secondaires indésirables. La tumorectomie comme la mastectomie peuvent causer une douleur persistante et de l'enflure et prendre du temps à guérir. Ces problèmes sont toutefois plus fréquents à la suite d'une mastectomie. La radiothérapie qui suit la tumorectomie peut cependant avoir elle aussi des effets secondaires indésirables, comme la fatigue, la douleur, la sensibilité au toucher et les cicatrices au sein. Le [guide 6](#) présente plus de détails sur la radiothérapie.

### **Faudrait-il enlever aussi les ganglions lymphatiques de l'aisselle?**

On procède souvent à l'ablation des ganglions lymphatiques (parfois appelés « glandes ») dans des cas de cancer du sein envahissant, mais non pour un CCIS. Cela tient au fait qu'il est très rare que le cancer se propage aux ganglions et que les complications possibles de l'ablation des ganglions lymphatiques annulent tout avantage qui peut en découler.

### **Si je subis une mastectomie à cause d'un CCIS, peut-on préserver la peau et le mamelon en vue d'une chirurgie esthétique ultérieure?**

On a déjà eu recours à cette intervention (appelée « mastectomie sous-cutanée ») chez des patientes atteintes d'un CCIS parce qu'elle donnait de bons résultats sur le plan esthétique. Or, comme cette technique laisse de 10 % à 15 % du tissu mammaire, elle élimine en partie seulement le risque de réapparition du cancer, et n'est pas aussi sûre que la mastectomie. Si vous choisissez de subir une mastectomie pour réduire le risque de récurrence du cancer au minimum, on ne recommande pas que vous vous soumettiez à une mastectomie sous-cutanée.

### **Et les autres traitements, comme le tamoxifène?**

Des preuves scientifiques indiquent que l'administration d'un traitement au tamoxifène, un médicament qui peut empêcher la croissance des cellules cancéreuses, pourrait bénéficier aux patientes atteintes de CCIS qui ont subi une tumorectomie. Vous devrez discuter avec votre médecin pour déterminer si l'avantage de l'utilisation du tamoxifène l'emporte sur les effets secondaires (voir le [guide 12](#)).
